# Supplementary material
Source: PubMed Central journal article supplement (PMC2738699)
Supplement: emboj2009203s1.pdf [file emboj2009203s1.pdf]

**Table SI. Peptides containing N-glycosylation sequons identified by mass spectrometry.** Proteins covalently linked to the yeast polysaccharide cell wall were prepared, glycans were released by endoglycosidase H, proteins were digested with trypsin or AspN, detected by LC-ESI-MS/MS and identified using Mascot.

| Glycosylation site      | Observed (m/z) | Observed (Da) | Predicted (Da) | $\Delta$ mass (Da) | Mascot value | Expect pI <sup>†</sup> | Sequence                             |
|-------------------------|----------------|---------------|----------------|--------------------|--------------|------------------------|--------------------------------------|
| CCW14_87*               | 1105.4781      | 2208.9416     | 2208.9481      | -0.0064            | 0.00072      | 3.55                   | A.DAAYSFAKSSCSEQNASLG.D              |
| CCW14_87                | 1003.9399      | 2005.8652     | 2005.8687      | -0.0034            | 8.2e-08      | 3.55                   | A.DAAYSFAKSSCSEQNASLG.D              |
| CRH1_177*               | 587.2590       | 1758.7551     | 1758.7559      | -0.0008            | 0.0054       | 5.41                   | K.FHNYTLDWAMDK.T                     |
| CRH1_177 <sup>#</sup>   | 519.5700       | 1555.6800     | 1555.6800      | 0.0000             | 8.40e-04     | 5.41                   | K.FHNYTLDWAMDK.T                     |
| CRH1_201*               | 1103.9957      | 2205.9768     | 2205.9810      | -0.0041            | 0.00015      | 6.34                   | R.VLSNTSSEGYPQSPMYLM.M               |
| CRH1_201                | 1002.4566      | 2002.8986     | 2002.9016      | -0.0029            | 2.9e-07      | 6.34                   | R.VLSNTSSEGYPQSPMYLM.M               |
| CRH2_28*                | 800.8329       | 1599.6512     | 1599.6545      | -0.0033            | 0.0034       | 3.85                   | A.ATFCNATQACPE.D                     |
| CRH2_28                 | 699.2941       | 1396.5737     | 1396.5751      | -0.0014            | 0.00011      | 3.85                   | A.ATFCNATQACPE.D                     |
| CRH2_96*                | 1095.5126      | 2189.0106     | 2189.0124      | -0.0018            | 1.8e-05      | 3.55                   | K.DYSSKLG NANTFLGNVSEA.D             |
| CRH2_96 <sup>#</sup>    | 993.9700       | 1985.9300     | 1985.9300      | 0.0000             | 3.90e-06     | 3.55                   | K.DYSSKLG NANTFLGNVSEA.D             |
| CRH2_233** <sup>#</sup> | 694.3300       | 2079.9800     | 2079.9800      | 0.0000             | 4.00e-02     | 9.14                   | R.TLYKNETY NATTQK.Y                  |
| CRH2_233*               | 626.6443       | 1876.9110     | 1876.9054      | 0.0055             | 0.002        | 9.14                   | R.TLYKNETY NATTQK.Y                  |
| CRH2_310*               | 1014.4757      | 2026.9368     | 2026.9371      | -0.0003            | 0.0021       | 9.13                   | K.NGTSA YVYTSSSEFLAK.D               |
| CRH2_310 <sup>#</sup>   | 913.4300       | 1824.8400     | 1824.8400      | 0.0000             | 1.30e-08     | 9.13                   | K.NGTSA YVYTSSSEFLAK.D               |
| CWP1_45                 | 973.9697       | 1945.9248     | 1945.9269      | -0.0021            | 1.5e-12      | 6.23                   | R.SGSDLQYLSVYSDNGTLK.L               |
| ECM33_83*               | 1064.5200      | 3190.5382     | 3190.5405      | -0.0023            | 0.0031       | 6.02                   | G.DLGSAAALSIQEIDGSLTIFNSSSLSSFS.A    |
| ECM33_197* <sup>#</sup> | 960.9200       | 1919.8300     | 1919.8300      | 0.0000             | 2.00e-03     | 3.49                   | S.DSLQFSSNGDNTTLAF.D                 |
| ECM33_210*              | 816.4229       | 1630.8312     | 1630.8315      | -0.0003            | 4.3e-05      | 6.23                   | F.DNLVWANNITLR.D                     |
| ECM33_210               | 714.8821       | 1427.7496     | 1427.7521      | -0.0025            | 2.2e-08      | 6.23                   | F.DNLVWANNITLR.D                     |
| ECM33_329*              | 1040.4481      | 2078.8816     | 2078.8851      | -0.0035            | 1e-06        | 6.18                   | R.GGANFDSSSNFSCNALK.K                |
| ECM33_329               | 938.9090       | 1875.8034     | 1875.8057      | -0.0024            | 3.5e-10      | 6.18                   | R.GGANFDSSSNFSCNALK.K                |
| EXG2_50*                | 848.4091       | 1694.8036     | 1694.8039      | -0.0004            | 0.01         | 6.23                   | K.FASYANDTITVK.G                     |
| GAS1_40*                | 923.4253       | 1844.8360     | 1844.8370      | -0.0010            | 0.0007       | 9.17                   | K.FFYSNNGSQFYIR.G                    |
| GAS1_57*                | 1098.8142      | 3293.4208     | 3293.4266      | -0.0058            | 9.4e-11      | 3.55                   | R.GVAYQADTANETSGSTVNDPLANYESCSR.D    |
| GAS1_57                 | 1031.1222      | 3090.3448     | 3090.3472      | -0.0025            | 1.4e-12      | 3.55                   | R.GVAYQADTANETSGSTVNDPLANYESCSR.D    |
| GAS1_95*                | 922.5202       | 2764.5388     | 2764.5374      | 0.0013             | 0.003        | 5.46                   | R.DIPYLK KLNTNVIRVY AINTTL.D         |
| GAS1_95                 | 854.8272       | 2561.4597     | 2561.4581      | 0.0017             | 0.0056       | 5.46                   | R.DIPYLK KLNTNVIRVY AINTTL.D         |
| GAS1_149**              | 1404.3256      | 4209.9550     | 4209.9543      | 0.0007             | 2e-05        | 3.75                   | K.TVVDTFANYTNVLGFFAGNEVTNNTDASAFVK.A |
| GAS1_149**              | 1065.1405      | 3192.3997     | 3192.4048      | -0.0051            | 5.3e-05      | 3.75                   | V.DTFANYTNVLGFFAGNEVTNNTD.           |
| GAS1_253*               | 1223.5809      | 2445.1472     | 2445.1522      | -0.0050            | 3.7e-05      | 6.34                   | K.NLSIPVFFSEYGCNEVTPR.L              |

|                       |           |           |           |         |          |       |                                   |
|-----------------------|-----------|-----------|-----------|---------|----------|-------|-----------------------------------|
| GAS1_253              | 1122.0434 | 2242.0722 | 2242.0728 | -0.0006 | 1.6e-08  | 6.34  | K.NLSIPVFFSEYGCNEVTPR.L           |
| GAS3_201*             | 847.0911  | 2538.2514 | 2538.2536 | -0.0022 | 0.13     | 10.45 | R.DMKQYISKHANRSIPVGYSAA.D         |
| GAS3_201              | 779.3984  | 2335.1733 | 2335.1743 | -0.0010 | 0.093    | 10.45 | R.DMKQYISKHANRSIPVGYSAA.D         |
| GAS3_269              | 578.7716  | 1155.5286 | 1155.5295 | -0.0009 | 0.031    | 3.88  | Y.DKLNSTFE.D                      |
| GAS3_350*             | 995.1586  | 2982.4539 | 2982.4557 | -0.0018 | 0.0021   | 9.53  | K.DDFVNLESQKKNVSLPTTKESEISS.D     |
| GAS3_350 <sup>#</sup> | 927.4700  | 2779.3800 | 2779.3800 | 0.0000  | 4.00e-02 | 9.53  | K.DDFVNLESQKKNVSLPTTKESEISS.D     |
| GAS5_24*              | 805.8911  | 1609.7677 | 1609.7683 | -0.0006 | 0.013    | 3.85  | A.ASSNSSTPSIEIK.G                 |
| GAS5_24               | 704.3501  | 1406.6856 | 1406.6889 | -0.0033 | 1.6e-05  | 3.85  | A.ASSNSSTPSIEIK.G                 |
| GAS5_60*              | 788.0484  | 2361.1235 | 2361.1237 | -0.0002 | 1.7e-05  | 3.49  | G.ERFYIRGVDYQPGGSSNLT.D           |
| GAS5_60*              | 1121.5385 | 3361.5937 | 3361.5984 | -0.0047 | 4.2e-05  | 3.49  | R.GVDYQPGGSSNLTDPADASVCDRDVPVLK.D |
| GAS5_60               | 1053.8453 | 3158.5141 | 3158.5190 | -0.0050 | 7.5e-08  | 3.49  | R.GVDYQPGGSSNLTDPADASVCDRDVPVLK.D |
| MKC7_346              | 821.9844  | 1641.9543 | 1641.9553 | -0.0010 | 0.00019  | 3.88  | E.DNLTTLTTKIPVLL.D                |
| PLB1_52*              | 891.4071  | 1780.7997 | 1780.8003 | -0.0006 | 0.03     | 4.43  | R.EASGLSDNETEWLK.K                |
| PLB1_489*             | 1217.1494 | 2432.2842 | 2432.2839 | 0.0004  | 2.7e-05  | 3.88  | R.NLTDLEYIPPLIVIPNSR.H            |
| PLB2_47*              | 848.4067  | 1694.7988 | 1694.7999 | -0.0011 | 1.6e-05  | 10.55 | R.NASGLSTAETDWLK.K                |
| PLB2_47*              | 912.9444  | 1823.8742 | 1823.8749 | -0.0007 | 5.5e-05  | 10.55 | D.DTSLVRNASGLSTAET.D              |
| PRY3_101*             | 884.4063  | 2650.1971 | 2650.1976 | -0.0005 | 0.00058  | 6.45  | K.YNYSNPGFSESTGHFTQVVWK.S         |
| SAG1_79*              | 1135.5709 | 2269.1272 | 2269.1325 | -0.0053 | 2e-09    | 11.66 | K.LLNSSQTATISLADGTEAFK.C          |
| SAG1_79               | 1034.0334 | 2066.0522 | 2066.0531 | -0.0009 | 1.1e-12  | 11.66 | K.LLNSSQTATISLADGTEAFK.C          |
| SAG1_109*             | 752.3167  | 1502.6188 | 1502.6195 | -0.0007 | 0.0001   | 3.85  | Y.ENTTFTCTAQN.D                   |
| SAG1_109              | 650.7751  | 1299.5357 | 1299.5401 | -0.0044 | 5e-07    | 3.85  | Y.ENTTFTCTAQN.D                   |
| SAG1_248*             | 723.3017  | 1444.5889 | 1444.5936 | -0.0047 | 0.00087  | 3.49  | N.DWWFPQSYN.D                     |
| TOS1_417*             | 627.8141  | 1253.6136 | 1253.6139 | -0.0003 | 0.033    | 7.55  | K.AAVIFNSSDK.T                    |
| TOS1_417              | 526.2738  | 1050.5331 | 1050.5346 | -0.0015 | 2.5e-05  | 7.55  | K.AAVIFNSSDK.T                    |

\* GlcNAc-modified asparagine (Bold N in sequence). <sup>#</sup> Previously identified (Schulz and Aebi 2009). All methionines are oxidized and all cysteines are alkylated.

<sup>†</sup>pI of Acceptor Site  $\pm$ 5 amino acids calculated with bisector method and EMBOSS pK<sub>i</sub> table excluding amine and carboxy terminal groups.

**Table SII.** Site-specific *N*-glycosylation occupancy of yeast strains expressing *T. brucei* Stt3p orthologues with and without yeast *STT3*. The relative *N*-glycosylation occupancy at a given site was determined from the abundance of GlcNAc-modified and unmodified versions of the same sequon-containing peptide as measured by LC-ESI-MS.

| Glycosylation site | Strain     |           |           |           |              |           |
|--------------------|------------|-----------|-----------|-----------|--------------|-----------|
|                    | Wild type  | pTbSTT3A  | pTbSTT3B  | pTbSTT3C  | <i>Δstt3</i> |           |
|                    |            |           |           |           | pTbSTT3B     | pTbSTT3C  |
| SAG1_248           | 1.00±0.00* | 1.00±0.00 | 1.00±0.00 | 1.00±0.00 | 0.99±0.02    | 1.00±0.00 |
| PRY3_101           | 1.00±0.00  | 1.00±0.00 | 1.00±0.00 | 1.00±0.00 | 1.00±0.00    | 1.00±0.00 |
| PLB1_52            | 1.00±0.00  | 1.00±0.00 | 1.00±0.00 | 1.00±0.00 | 0.72±0.15    | 1.00±0.00 |
| PLB1_489           | 1.00±0.00  | 1.00±0.00 | 1.00±0.00 | 1.00±0.00 | 1.00±0.00    | 1.00±0.00 |
| GAS1_57            | 1.00±0.00  | 1.00±0.00 | 1.00±0.00 | 1.00±0.00 | 0.90±0.10    | 1.00±0.00 |
| ECM33_83           | 1.00±0.00  | 1.00±0.00 | 1.00±0.00 | 1.00±0.00 | 1.00±0.00    | 1.00±0.00 |
| CRH2_96            | 1.00±0.00  | 1.00±0.00 | 1.00±0.00 | 1.00±0.00 | 1.00±0.00    | 1.00±0.00 |
| GAS1_149           | 1.00±0.00  | 1.00±0.00 | 1.00±0.00 | 1.00±0.00 | 1.00±0.00    | 0.99±0.02 |
| ECM33_197          | 1.00±0.00  | 1.00±0.00 | 1.00±0.00 | 1.00±0.00 | 0.91±0.01    | 0.99±0.01 |
| GAS3_269           | 1.00±0.00  | 1.00±0.00 | 1.00±0.00 | 1.00±0.00 | 1.00±0.00    | 0.99±0.01 |
| CRH1_177           | 1.00±0.00  | 1.00±0.00 | 1.00±0.00 | 1.00±0.00 | 0.97±0.02    | 0.99±0.01 |
| EXG2_50            | 1.00±0.00  | 1.00±0.00 | 1.00±0.00 | 1.00±0.00 | 1.00±0.00    | 0.96±0.05 |
| GAS1_40            | 1.00±0.00  | 1.00±0.00 | 1.00±0.00 | 1.00±0.00 | 1.00±0.00    | 0.94±0.07 |
| CRH2_310           | 1.00±0.00  | 1.00±0.00 | 1.00±0.00 | 1.00±0.00 | 1.00±0.00    | 0.91±0.16 |
| GAS3_350           | 1.00±0.00  | 1.00±0.00 | 1.00±0.00 | 1.00±0.00 | 1.00±0.01    | 0.88±0.08 |
| CRH2_28            | 1.00±0.00  | 1.00±0.00 | 1.00±0.00 | 1.00±0.00 | 0.98±0.02    | 0.87±0.06 |
| GAS5_24            | 1.00±0.00  | 1.00±0.00 | 1.00±0.00 | 1.00±0.00 | 0.98±0.2     | 0.80±0.02 |
| GAS1_95            | 1.00±0.00  | 1.00±0.00 | 1.00±0.00 | 1.00±0.00 | 1.00±0.00    | 0.67±0.13 |
| CRH1_201           | 1.00±0.00  | 1.00±0.00 | 1.00±0.00 | 1.00±0.00 | 0.97±0.04    | 0.66±0.04 |
| GAS1_253           | 1.00±0.00  | 1.00±0.00 | 1.00±0.00 | 1.00±0.00 | 0.91±0.04    | 0.63±0.11 |
| GAS5_60            | 1.00±0.00  | 1.00±0.00 | 1.00±0.00 | 1.00±0.00 | 0.72±0.06    | 0.63±0.11 |
| ECM33_210          | 1.00±0.00  | 1.00±0.00 | 1.00±0.00 | 1.00±0.00 | 0.99±0.01    | 0.61±0.05 |
| CRH2_233           | 1.00±0.00  | 1.00±0.00 | 1.00±0.00 | 1.00±0.00 | 1.00±0.00    | 0.57±0.10 |
| MKC7_346           | 1.00±0.00  | 1.00±0.00 | 1.00±0.00 | 1.00±0.00 | 0.39±0.17    | 0.43±0.04 |
| PLB2_47            | 1.00±0.00  | 1.00±0.00 | 1.00±0.00 | 1.00±0.00 | 0.57±0.23    | 0.00±0.00 |
| GAS3_201           | 1.00±0.00  | 1.00±0.00 | 1.00±0.00 | 1.00±0.00 | 1.00±0.00    | 0.00±0.00 |
| ECM33_329          | 1.00±0.00  | 1.00±0.00 | 1.00±0.00 | 1.00±0.00 | 0.41±0.08    | 0.00±0.00 |
| SAG1_109           | 0.97±0.02  | 1.00±0.00 | 0.93±0.06 | 0.87±0.10 | 0.69±0.07    | 0.30±0.02 |
| SAG1_79            | 0.80±0.03  | 0.84±0.05 | 0.85±0.07 | 0.75±0.05 | 0.91±0.05    | 0.00±0.00 |
| CWP1_45            | 0.02±0.02  | 0.02±0.01 | 0.01±0.01 | 0.00±0.01 | 0.00±0.00    | 0.00±0.00 |
| CCW14_87           | 0.00±0.00  | 0.00±0.00 | 0.01±0.00 | 0.01±0.00 | 0.01±0.01    | 0.08±0.01 |
| TOS1_417           | 0.00±0.00  | 0.00±0.00 | 0.23±0.08 | 0.00±0.00 | 0.43±0.17    | 0.03±0.04 |

\* Error is range. Values are the average of three independent measurements

**Table SIII. Isobaric glycoforms of sVSG221 detected by ES-MS**

The molecular weights of different glycoforms of sVSG221 were calculated according to the indicated compositions. The -, trace, +, ++, +++ scores indicate the relative abundances of those glycoforms observed in sVSG preparations.

| Protein <sup>a</sup> | I-cP <sup>b</sup> | GlcN <sup>b</sup> | EtNP <sup>b</sup> | HexNAc | Hex | Mr                 | WT    | <i>STT3A,B,C</i> <sup>-</sup> | <i>STT3A</i> <sup>-</sup> | <i>STT3A</i> <sup>+</sup> | <i>STT3B</i> <sup>-</sup> | <i>STT3B</i> <sup>+</sup> |
|----------------------|-------------------|-------------------|-------------------|--------|-----|--------------------|-------|-------------------------------|---------------------------|---------------------------|---------------------------|---------------------------|
| 1                    | 1                 | 1                 | 1                 | 2      | 9   | 48663              | -     | -                             | -                         | -                         | -                         | trace                     |
| 1                    | 1                 | 1                 | 1                 | 2      | 10  | 48825              | -     | -                             | -                         | -                         | -                         | +                         |
| 1                    | 1                 | 1                 | 1                 | 2      | 11  | 48987              | -     | -                             | -                         | -                         | -                         | +++                       |
| 1                    | 1                 | 1                 | 1                 | 2      | 12  | 49146              | -     | -                             | -                         | -                         | -                         | +++                       |
| 1                    | 1                 | 1                 | 1                 | 3      | 11  | 49188              | -     | -                             | -                         | -                         | -                         | +                         |
| 1                    | 1                 | 1                 | 1                 | 2      | 13  | 49312              | -     | -                             | -                         | -                         | -                         | -                         |
| 1                    | 1                 | 1                 | 1                 | 3      | 12  | 49350              | -     | -                             | -                         | -                         | -                         | ++                        |
| 1                    | 1                 | 1                 | 1                 | 2      | 14  | 49465              | -     | -                             | -                         | -                         | -                         | +                         |
| 1                    | 1                 | 1                 | 1                 | 3      | 13  | 49513              | -     | -                             | -                         | -                         | -                         | +                         |
| 1                    | 1                 | 1                 | 1                 | 3      | 14  | 49675              | +     | -                             | -                         | +                         | -                         | +                         |
| 1                    | 1                 | 1                 | 1                 | 4      | 17  | 50363              | trace | trace                         | trace                     | trace                     | trace                     | -                         |
| 1                    | 1                 | 1                 | 1                 | 4      | 18  | 50525              | ++    | ++                            | ++                        | +                         | ++                        | -                         |
| 1                    | 1                 | 1                 | 1                 | 6      | 16  | 50611              | -     | -                             | -                         | -                         | -                         | +                         |
| 1                    | 1                 | 1                 | 1                 | 4      | 19  | 50687              | +++   | +++                           | +++                       | ++                        | +++                       | -                         |
| 1                    | 1                 | 1                 | 1                 | 5      | 18  | 50726              | trace | trace                         | trace                     | trace                     | trace                     | -                         |
| 1                    | 1                 | 1                 | 1                 | 6      | 17  | 50773              | trace | trace                         | trace                     | trace                     | trace                     | -                         |
| 1                    | 1                 | 1                 | 1                 | 7      | 16  | 50812              | -     | -                             | -                         | +                         | -                         | +                         |
| 1                    | 1                 | 1                 | 1                 | 4      | 20  | 50849 <sup>c</sup> | +++   | +++                           | +++                       | +++                       | +++                       | -                         |
| 1                    | 1                 | 1                 | 1                 | 5      | 19  | 50889              | +     | +                             | +                         | +                         | +                         | -                         |
| 1                    | 1                 | 1                 | 1                 | 4      | 21  | 51012              | ++    | ++                            | ++                        | ++                        | ++                        | -                         |
| 1                    | 1                 | 1                 | 1                 | 5      | 20  | 51053              | +++   | +++                           | +++                       | ++                        | +++                       | -                         |
| 1                    | 1                 | 1                 | 1                 | 4      | 22  | 51174              | +     | +                             | +                         | +                         | +                         | -                         |
| 1                    | 1                 | 1                 | 1                 | 8      | 17  | 51178              | -     | -                             | -                         | -                         | -                         | +                         |
| 1                    | 1                 | 1                 | 1                 | 5      | 21  | 51211              | +     | +                             | +                         | ++                        | +                         | -                         |
| 1                    | 1                 | 1                 | 1                 | 4      | 23  | 51337              | +     | +                             | +                         | +                         | +                         | -                         |
| 1                    | 1                 | 1                 | 1                 | 8      | 18  | 51340              | -     | -                             | -                         | -                         | -                         | +                         |
| 1                    | 1                 | 1                 | 1                 | 5      | 22  | 51372              | +     | +                             | +                         | +                         | +                         | -                         |
| 1                    | 1                 | 1                 | 1                 | 4      | 24  | 51497              | trace | trace                         | trace                     | ++                        | trace                     | -                         |
| 1                    | 1                 | 1                 | 1                 | 5      | 23  | 51534              | -     | -                             | -                         | trace                     | -                         | -                         |
| 1                    | 1                 | 1                 | 1                 | 4      | 25  | 51659              | -     | -                             | -                         | +++                       | -                         | -                         |
| 1                    | 1                 | 1                 | 1                 | 4      | 26  | 51821              | -     | -                             | -                         | ++                        | -                         | -                         |
| 1                    | 1                 | 1                 | 1                 | 4      | 27  | 51983              | -     | -                             | -                         | +                         | -                         | -                         |

<sup>a</sup> Protein Mr is based on the amino acid sequence of the VSG221 precursor (accession no. P26332) minus residues 1- 27 (signal peptide) and 460-476 (GPI attachment signal peptide) and allows for four disulfide bonds (Mr = 46284)

<sup>b</sup> Components specific to the GPI anchor and common to all glycoforms; I-cP *myo*-inositol-1,2 cyclic phosphate; EtNP, ethanolamine phosphate.

<sup>c</sup> The most abundant glycoform of wild-type sVSG221 is expected to contain a GPI anchor of composition of Man3Gal5, a C-terminal N-linked glycan of Man9GlcNAc2 and an internal N-linked glycan of Man3GlcNAc2; i.e., HexNAc (GlcNAc) = 4 and Hex (Man + Gal) = 20.

**Table SIV. VSG221 glycopeptide ions identified by ES-MS.** The masses of the principal glycopeptides observed after sVSG pronase digestion of the different cell lines and conditions are listed along with their relative intensities and their peptide and glycan assignments. The ions corresponding to the Asn263 external site are in yellow, those corresponding to the Asn428 external site are in pink and those corresponding to the Ser433 GPI site are in blue. Isobaric Asn263 and Asn 428 glycopeptides are in green.

| Ion      | Mass    | AA      | Glycan         | Ion intensity |       |            |            |            |             |
|----------|---------|---------|----------------|---------------|-------|------------|------------|------------|-------------|
|          |         |         |                | wt            | sKO   | stt3A -Tet | stt3A +Tet | stt3B -Tet | stt3B + Tet |
| [M+H]1+  | 1254.46 | NET     | Hex3HexNAc2    | 263           | 58    | 439.4      | 173.4      | 1095.3     | 881.7       |
| [M+2H]2+ | 1287.54 | NT      | Hex4HexNAc2    |               |       |            |            | 92.2       |             |
| [M+2H]2+ | 1388.59 | NTT     | Hex4HexNAc2    |               |       |            |            | 43.5       |             |
| [M+2H]2+ | 1410.56 | RNET    | Hex3HexNAc2    | 324           | 170.8 | 529.2      | 202.6      | 854.1      | 396.7       |
| [M+2H]2+ | 1416.51 | NET     | Hex4HexNAc2    | 13            |       | 44.7       | 18.3       | 424.7      | 196.3       |
| [M+2H]2+ | 1423.36 | S-EtNP  | Hex5HexN-InocP |               |       |            |            | 410.2      | 20.6        |
| [M+2H]2+ | 1438.61 | NET     | Hex4HexNAc2    |               |       |            |            |            | 24.7        |
| [M+2H]2+ | 1449.53 | NT      | Hex5HexNAc2    | 0.8           |       |            |            | 262.11     |             |
| [M+2H]2+ | 1457.54 | NET     | Hex3HexNAc3    | 146           | 57.3  | 222.4      | 31.1       | 1137.8     | 363.5       |
| [M+2H]2+ | 1489.65 | TNTT    | Hex4HexNAc2    |               |       |            |            |            |             |
| [M+2H]2+ | 1490.56 | NT      | Hex4HexNAc3    | 0.5           | 0.4   |            |            | 37.1       | 24.5        |
| [M+2H]2+ | 1550.58 | NTT     | Hex5HexNAc2    | 0.8           |       |            |            | 18.5       |             |
| [M+2H]2+ | 1578.56 | NET     | Hex5HexNAc2    | 0.7           |       | 5.5        |            | 32.8       | 38.4        |
| [M+2H]2+ | 1585.42 | S-EtNP  | Hex6HexN-InocP | 146           | 107.2 | 286.2      | 11.8       | 1884       | 89          |
| [M+2H]2+ | 1591.61 | NTT     | Hex4HexNAc3    | 0.4           |       | 4.9        |            | 28.5       | 14.2        |
| [M+2H]2+ | 1611.58 | NT      | Hex6HexNAc2    | 33.1          | 25.4  |            |            | 349        |             |
| [M+2H]2+ | 1613.64 | RNET    | Hex3HexNAc3    | 132           | 65.2  | 182.3      | 3.2        | 604.3      | 170.6       |
| [M+2H]2+ | 1619.59 | NET     | Hex4HexNAc3    | 116           | 73.9  | 231.2      | 75.6       | 1387.4     | 323.8       |
| [M+2H]2+ | 1635.65 | RNET+Na | Hex3HexNAc3    |               |       |            |            |            |             |
| [M+2H]2+ | 1641.7  | NET+Na  | Hex4HexNAc3    | 54.2          | 22.6  | 70.4       | 52.3       | 316.5      | 350.2       |
| [M+2H]2+ | 1651.63 | TNTT    | Hex5HexNAc2    |               |       |            |            | 3.9        |             |
| [M+2H]2+ | 1685.67 | NET+3Na | Hex4HexNAc3    |               |       |            |            |            | 1.7         |
| [M+2H]2+ | 1712.62 | NTT     | Hex6HexNAc2    | 69.7          | 38.9  | 1.7        | 2.5        | 535.3      |             |
| [M+2H]2+ | 1740.62 | NET     | Hex6HexNAc2    |               |       | 119.6      | 4.2        | 595.1      | 122.2       |
| [M+2H]2+ | 1747.48 | S-EtNP  | Hex7HexN-InocP | 170           | 327.7 | 600        | 133.8      | 3472.8     | 514.5       |
| [M+2H]2+ | 1762.74 | NET+Na  | Hex6HexNAc2    |               |       | 0.4        |            |            | 167.1       |
| [M+2H]2+ | 1773.62 | NT      | Hex7HexNAc2    | 50.3          | 35.4  | 108.4      | 54.8       | 488.3      |             |
| [M+2H]2+ | 1775.77 | RNET    | Hex4HexNAc3    | 143           | 91.7  | 318        | 85.4       | 788        | 224.4       |
| [M+2H]2+ | 1781.64 | NET     | Hex5HexNAc3    | 44.5          | 32.2  | 100.7      |            | 786.4      | 35.2        |
| [M+2H]2+ | 1803.78 | NET+Na  | Hex5HexNAc3    | 33.9          |       |            |            | 258.6      | 244.8       |
| [M+2H]2+ | 1813.67 | TNTT    | Hex6HexNAc2    | 20.1          | 10.1  |            |            | 1.2        |             |
| [M+2H]2+ | 1814.66 | NT      | Hex6HexNAc3    |               |       |            |            | 1.23       |             |
| [M+2H]2+ | 1874.67 | NTT     | Hex7HexNAc2    | 135           | 65.8  | 182.9      | 60.2       | 922.4      |             |
| [M+2H]2+ | 1896.72 | RNET    | Hex6HexNAc2    | 80.1          | 25.4  |            |            | 233.5      | 194.6       |
| [M+2H]2+ | 1902.86 | NET     | Hex7HexNAc2    |               |       |            |            | 0.6        | 0.4         |
| [M+2H]2+ | 1909.53 | S-EtNP  | Hex8HexN-InocP | 241           | 175.1 | 724.3      | 142.3      | 2491.9     | 438.1       |
| [M+2H]2+ | 1935.67 | NT      | Hex8HexNAc2    | 131           | 112.6 | 192.2      | 107.7      | 1301.7     | 88.6        |
| [M+2H]2+ | 1937.74 | RNET    | Hex5HexNAc3    |               |       | 131.8      |            |            |             |
| [M+2H]2+ | 1943.7  | NET     | Hex6HexNAc3    |               |       | 0.6        |            | 425.2      |             |
| [M+2H]2+ | 1956.73 | NTT     | Hex5HexNAc4    |               |       | 0.4        |            |            |             |
| [M+2H]2+ | 1957.6  | NT+Na   | Hex8HexNAc2    | 87            | 38.3  |            |            | 616.5      | 286.1       |
| [M+2H]2+ | 1965.86 | NET+Na  | Hex6HexNAc3    |               |       |            |            |            | 155.5       |
| [M+2H]2+ | 1975.72 | TNTT    | Hex7HexNAc2    | 42.3          | 18    |            | 60.7       | 274.8      |             |
| [M+2H]2+ | 1978.88 | NTT+Na  | Hex5HexNAc4    |               |       |            |            |            | 253.5       |
| [M+2H]2+ | 2036.72 | NTT     | Hex8HexNAc2    | 262           | 126.6 | 357.9      | 197.6      | 1728.9     |             |
| [M+2H]2+ | 2065.01 | NET     | Hex8HexNAc2    |               |       |            | 42.5       | 0.8        |             |
| [M+2H]2+ | 2071.58 | S-EtNP  | Hex9HexN-InocP | 125           | 31.9  | 349.4      | 57.1       | 827.8      | 152.6       |
| [M+2H]2+ | 2097.72 | NT      | Hex9HexNAc2    | 212           | 159.2 | 307.5      | 180.3      | 2127       |             |
| [M+2H]2+ | 2198.77 | NTT     | Hex9HexNAc2    | 420           | 250   | 533.5      | 280        | 3084.5     |             |
| [M+2H]2+ | 2220.7  | NTT+Na  | Hex9HexNAc2    | 280           | 96.5  | 207.2      | 294.7      | 925.7      | 218.3       |
| [M+2H]2+ | 2227.01 | NET     | Hex9HexNAc2    |               | 8.1   |            | 58.5       |            |             |
| [M+2H]2+ | 2299.82 | TNTT    | Hex9HexNAc2    | 183           | 50.3  |            |            | 1025.2     |             |
| [M+2H]2+ | 2586.16 | NT      | Hex7HexNAc6    | 8             | 1     | 55.8       |            | 178.3      | 124.1       |
| [M+2H]2+ | 2608.16 | NT+Na   | Hex7HexNAc6    |               | 0.5   |            |            |            | 149.5       |
| [M+3H]3+ | 2686.99 | NTT     | Hex7HexNAc6    |               |       | 72.8       |            | 207        | 103         |
| [M+2H]2+ | 2709.2  | NTT+Na  | Hex7HexNAc6    | 7.5           | 1.2   | 19         | 30.3       | 46.9       | 146.7       |

**Table SV. Distribution of the isoelectric point per class of glycan**

Summary statistics for the distribution of pI of the sequon  $\pm$  5 amino acids for each class of glycan. The -, +, +/-, values indicate whether the glycan is resistant, sensitive or partially sensitive to digestion with EndoH, respectively.

|                    | EndoH Sensitivity |     |     |           |
|--------------------|-------------------|-----|-----|-----------|
| Site Type          | -                 | +   | +/- | No glycan |
| Count <sup>a</sup> | 95                | 26  | 55  | 4         |
| Mean <sup>b</sup>  | 4.8               | 9.5 | 7.3 | 6.0       |
| Variance           | 3.0               | 4.7 | 5.8 | 7.1       |
| Standard deviation | 1.7               | 2.2 | 2.4 | 2.7       |

<sup>a</sup> Absolute number of sequons distributed according to their sensitivity to EndoH and/or its occupancy from a total set of 180 sequons identified.

<sup>b</sup> Arithmetic mean of the pI value of the sequon  $\pm$  5 amino acids

**Table SVI. Statistical analysis of the pI distribution per class of glycan**

Statistics analysis for the pI distribution of the sequon  $\pm$  5 amino acids for each class of glycan. The -, +, +/-, values indicate whether the glycan is resistant, sensitive or partially sensitive to digestion with EndoH, respectively.

| Glycan PI value sets |             | Wilcoxon <sup>b</sup> |                       | Kolmogorov-Smirnov <sup>c</sup> |                       |
|----------------------|-------------|-----------------------|-----------------------|---------------------------------|-----------------------|
| A                    | B           | W Parameter           | P value <sup>a</sup>  | D parameter                     | P value <sup>a</sup>  |
| EndoH (-)            | EndoH (+)   | 149.5                 | $7.3 \times 10^{-12}$ | 0.7789                          | $3.5 \times 10^{-11}$ |
| EndoH (-)            | EndoH (+/-) | 1025                  | $5.8 \times 10^{-10}$ | 0.5426                          | $2.5 \times 10^{-9}$  |
| EndoH (+)            | EndoH (+/-) | 345                   | $1.8 \times 10^{-4}$  | 0.4923                          | $3.8 \times 10^{-4}$  |

<sup>a</sup> P-value is an estimate of the probability of the two sets of pI values (A and B) could be drawn from the same distribution.

<sup>b</sup> The Wilcoxon test, normally applied to test the membership of normally distributed data, is included since the datasets are sufficiently large for the P value to be meaningful for non-normally distributed data.

<sup>c</sup> The Kolmogorov-Smirnov statistic is suitable for testing membership of any distribution.

**Fig. S1**

**A** Expression of TbSTT3 in yeast

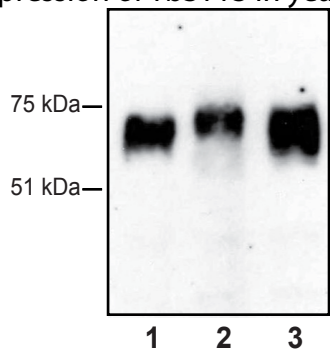

**B** Quantitative RT-PCR of TbSTT3 mRNA

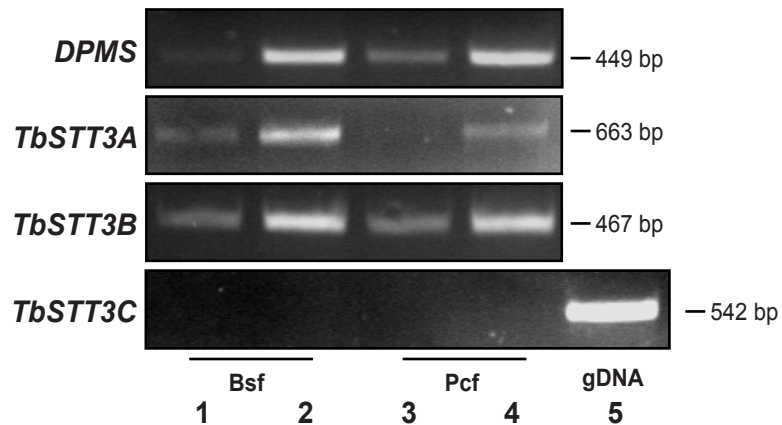

Characterisation of TbSTT3A,B,C<sup>+/-</sup> heterozygote VSG

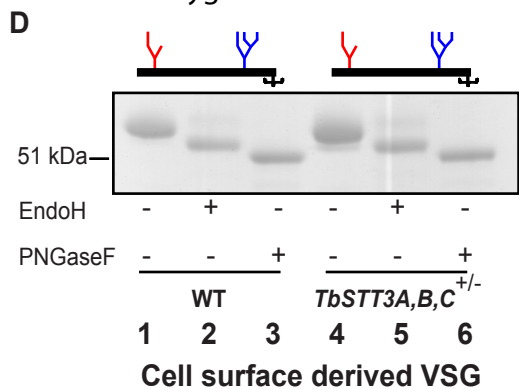

**E** Genotypic analysis of TbSTT3 RNAi cell lines.

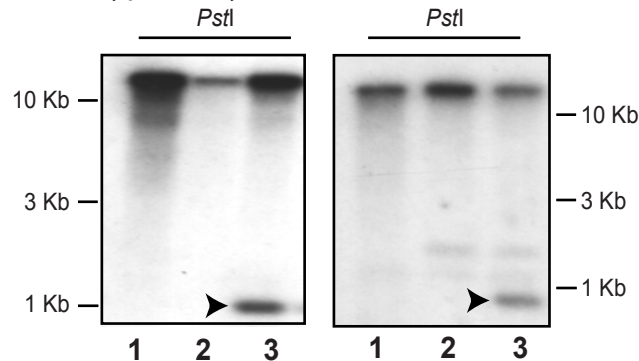

Creation of the *T. brucei* bsf TbSTT3A,B,C<sup>+/-</sup> heterozygote.

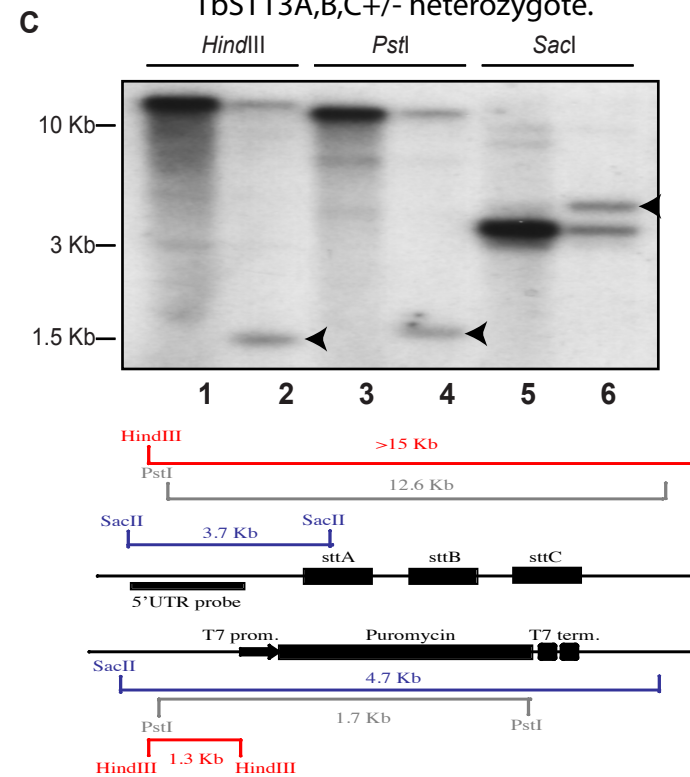

**F** Combined essentiality of TbSTT3A and B in culture

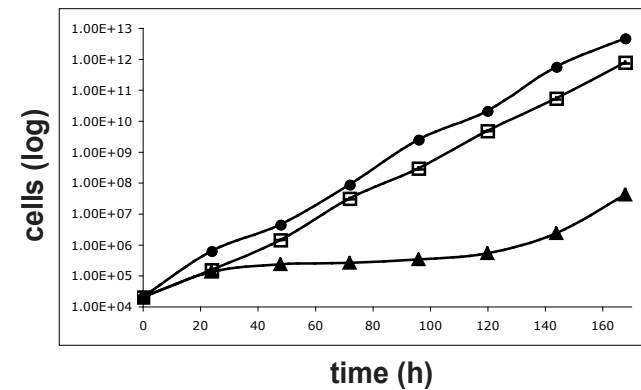







**Fig. S4** Scheme describing the proteomic approach for the identification of EndoH-sensitive (blue) and EndoH-resistant (red) N-glycosylation sites.

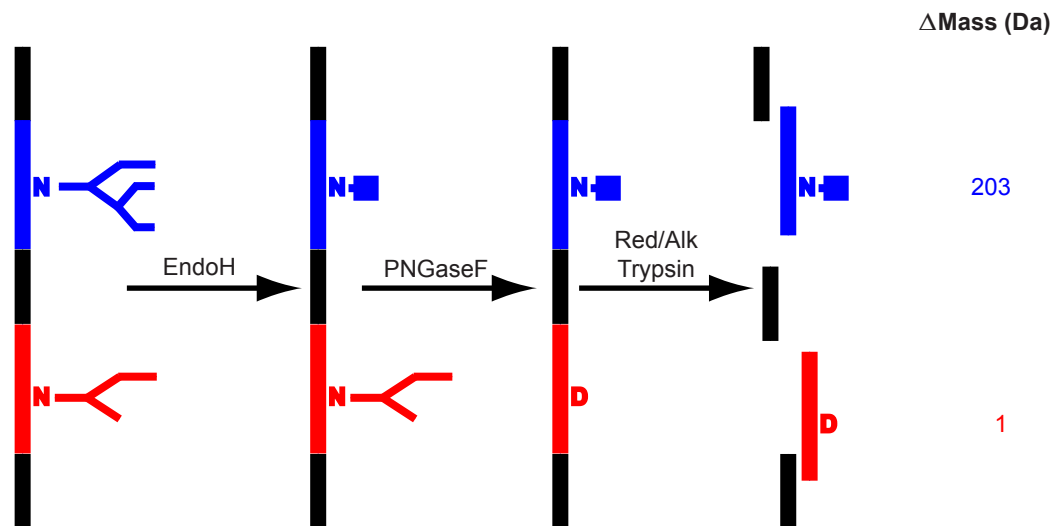

EndoH sensitive sites are cleaved with endoH, leaving a 203Da GlcNAc (blue square) tags attached to the glycosylated asparagine (N) residues. Subsequent treatment with PNGaseF cleaves all remaining N-glycans and converts the glycosylated asparagine (N) residues to aspartate (D) residues, which are 1 Da heavier. Subsequent reduction, S-alkylation and digestion with trypsin liberates the modified peptides for analysis by LC-MS/MS and the original glycosylation status can be inferred from the 203 Da and 1 Da mass shifts in the precursor ions, the MASCOT assignments and manual inspection of the MS/MS spectra.

## Supplementary Figure Legends

### Fig. S1.

**(A) Expression of *T. brucei* Stt3p homologues in *S.cerevisiae*.** Whole cell protein extracts of yeast cells with wild type OTase expressing in addition TbStt3Ap, TbStt3Bp or TbStt3Cp (lanes 1-3, respectively) were separated by SDS-PAGE, electroblotted to nitrocellulose and probed with  $\alpha$ -C-myc antibody.

**(B) Quantitative RT-PCR of TbSTT3 mRNA.** mRNA levels of *DPMS*, *TbSTT3A*, *TbSTT3B* and *TbSTT3C* were quantified by RT-PCR amplification in bloodstream and procyclic form *T. brucei*, using total RNA from each lifecycle stage as the template (lane 1, 6 ng of bloodstream form total RNA; lane 2, 48 ng of bloodstream form total RNA; lane 3, 6 ng of procyclic form total RNA; lane 4, 48 ng of procyclic form total RNA; lane 5, 30 ng of *T. brucei* gDNA). The primers used were specific for the *STT3A*, *STT3B* and *STT3C* genes, as well as for the gene encoding *DPMS* (1) constitutively expressed in a similar way in both lifecycle stages.

**(C) Creation of the *T.brucei* bsf TbSTT3A,B,C<sup>+/-</sup> heterozygote.** Schematic representation of the replacement of one *TbSTT3* locus with drug resistance gene *PAC* (bottom) and Southern blot of genomic DNA (top) from wild type (lanes 1, 3 and 5) and the *TbSTT3A,B,C<sup>+/-</sup>* cell line (lanes 2, 4 and 6) digested with *Hind*III (lanes 1 and 2), *Pst*I (lanes 3 and 4) and *Sac*II (lanes 5 and 6) and probed with a 5'UTR *TbSTT3A,B,C* fragment. The additional bands in lanes 2, 4 and 6 (marked with an arrowhead) are consistent with the replacement of one of the two *TbSTT3A,B,C* loci with the *PAC* construct.

**(D) Characterisation of TbSTT3A,B,C<sup>+/-</sup> heterozygote VSG.** Purified mature sVSG WT (lanes 1-3) and *TbSTT3A,B,C<sup>+/-</sup>* (lanes 4-6) cells digested or not, as indicated, with Endo H or PNGase F were subjected SDS-PAGE and stained with Coomassie blue.

**(E) Genotypic analysis of TbSTT3 RNAi cell lines.** Southern blot of genomic DNA from wild type (lane 1), *TbSTT3A,B,C<sup>+/-</sup>* (lane 2) and the *TbSTT3A,B,C<sup>+/-</sup>-STT3ARNAi* cell line (lane 3, left panel) or *TbSTT3A,B,C<sup>+/-</sup>-STT3BRNAi* cell line (lane 3, right panel) digested with *Pst*I and probed with a *TbSTT3A* ORF fragment (left panel) or *TbSTT3B* ORF fragment (left panel). In both panels, the extra band in lane 3 (marked with arrowheads) are consistent to respective RNAi fragment integrated in the cell line genome.

**(F) Combined essentiality of TbSTT3A and B in culture.** Growth at 37°C of *T. brucei* wild type cells (closed circles), *TbSTT3A,B,C<sup>+/-</sup>-STT3AllRNAi* minus Tet (open squares), *TbSTT3A,B,C<sup>+/-</sup>-STT3All* RNAi plus Tet (closed triangles). Cells were counted in triplicate and mean values ± S.D. are shown.

**Fig. S2. Analysis of TbSTT3 predicted amino acid sequences.** Alignment of TbSTT3A, TbSTT3B and TbSTT3C extracted from HOGENOM family alignment HBG269471, A '.' indicates residues identical to the consensus, gaps shown as blanks. The solid line marks the region homologous to *Pirococcus furiosus* (2) identified using the sequence of STT3A as input to the FFAS03 fold recognition server (3). The conserved WWDYG and DxxK motifs are indicated in both panels with numbers 1 and 2, respectively. Transmembrane helices predicted by the Phobius server (4) are shown as white letters on a light grey background. Alignments visualized with Jalview (5).

**Fig. S3. Relative abundances of N-linked Pronase glycopeptide ions.**

(A) Intensities of ES-MS glycopeptide ions, relative to the most abundant glycopeptide ion in the sample spectrum, for Asn263 (upper panel) and Asn428 (lower panel) Pronase glycopeptides of sVSG221 from *TbSTT3A,B,C<sup>+/-</sup>-STT3ARNAi* cells grown minus Tet (blue bars) and plus Tet (red bars).

(B) Intensities of ES-MS glycopeptide ions, relative to the most abundant glycopeptide ion in the sample spectrum, for Asn263 (upper panel) and Asn428 (lower panel) Pronase glycopeptides of sVSG221 from *TbSTT3A,B,C<sup>+/-</sup>-STT3BRNAi* cells grown minus Tet (black bars) and plus Tet (grey bars).

The data used to generate these graphs are in Table SIV. The glycopeptide compositions were assigned by deduced glycopeptide mass and their MS/MS daughter ion spectra (not shown), as described in (Manthri et al, 2008).

**Fig. S4. Scheme describing the proteomic approach for the identification of EndoH-sensitive and EndoH-resistant N-glycosylation sites.** Glycoprotein enriched fractions from ricin- and ConA-affinity chromatography are digested sequentially with EndoH, leaving a 203 Da GlcNAc tag on the EndoH-sensitive sites, and subsequently with PNGaseF, leaving a 1 Da Asn→Asp tag on the EndoH-resistant sites.

## Supplementary Material and Methods

**Immunoblot analysis.** Cells were grown at 23°C to mid-log phase, corresponding to an O.D.<sub>600nm</sub> of 1. Cell pellets were lysed with glass beads and cell debris was removed by centrifugation at 3 000 rcf at 4 °C for 3 min. Proteins were denatured by incubation in reducing SDS sample buffer including 4M urea. Proteins were separated by SDS-PAGE, electroblotted to nitrocellulose membrane, and probed with  $\alpha$ -C-myc antibody (Calbiochem).

**Semiquantitative RT-PCR.** In order to assess the amount of mRNA, RT-PCR reactions were performed using AccessQuick RT-PCR System (Promega). As template 6 ng and 48 ng of total RNA from bloodstream and procyclic form of the parasite was used. The reaction was carried out in a GeneAmp PCR System 2700 from Applied Biosystems. Tb927.5.890 mRNA 663bp fragment was amplified with primers 5' TGTGGCAAGTTTGCTTGC 3' and 5' ATTGGGTAGATCAGTCACG 3'. Tb927.5.900 mRNA 467bp fragment was amplified with primers 5' GATGATTTCTTTGGTTACC 3' and 5' CTCAGAATATATCCGGAA 3'. Tb927.5.910 mRNA 542bp fragment was amplified with primers 5' GGCCTTCCTACGTCATC 3' and 5' TCATCGGCAAGAACCAAC 3'. As a control of a similar mRNA levels in both life stages of the parasite, primers 5' AATGGATGCGGACCTTCAGCACCCAC 3' and 5' TAGAACCGTGAGCGCGGTGCCATAC 3' amplifying a 449bp length product of dolichyl-phosphate-mannose synthetase (Tb10.70.2610) were used (1). The cycling parameters used were 48 °C for 45 min, 94 °C for 2 min, 25 cycles of 94 °C for 40 s, 60 °C for 1 min 15 s, and 68 °C for 1 min followed by a final 7 min extension time at 68 °C.

**Southern Blotting.** Aliquots of genomic DNA isolated from 100 ml of bloodstream-form *T. brucei* cultures ( $\sim 2 \times 10^8$  cells) were digested with various restriction enzymes, run on agarose gels and transferred to positively charged nylon membranes (Roche) for hybridization with [ $\alpha$ -<sup>32</sup>P] dCTP-labeled DNA probes (Amersham Rediprime II).

**Statistical analysis of glycan site dataset.** After manual analysis and verification of the MASCOT searches, a dataset was obtained comprising 180 characterised sequons. pI calculations of the region comprising the sequon and the five adjacent amino acids

up and downstream were performed with the Bisector method as implemented in BioPerl, with the non-terminal amino-acid p*K*<sub>i</sub> values from the EMBOSS table. Both Wilcoxon and Kolmogorov-Smirnov tests confirmed that the distribution of pI for the three glycan site types are significantly different (Table S5).

### Supplementary references

1. Mazhari-Tabrizi R, *et al.* (1996) Cloning and functional expression of glycosyltransferases from parasitic protozoans by heterologous complementation in yeast: the dolichol phosphate mannose synthase from *Trypanosoma brucei brucei*. *Biochem J* 316 (Pt 3): 853-858.
2. Igura M, *et al.* (2008) Structure-guided identification of a new catalytic motif of oligosaccharyltransferase. *Embo J* 27(1): 234-243.
3. Jaroszewski L, Rychlewski L, Li Z, Li W & Godzik A. (2005) FFAS03: a server for profile-profile sequence alignments. *Nucleic Acids Res* 33, W284-W288 <http://ffas.burnham.org/ffas-cgi/cgi/ffas.pl>
4. Käll L, Krogh A, Sonnhammer EL. (2007) Advantages of combined transmembrane topology and signal peptide prediction--the Phobius web server. *Nucleic Acids Res* 35 W429-W432
5. Waterhouse AM, Procter JB, Martin DM, Clamp M, Barton GJ. (2009) Jalview Version 2 - a multiple sequence alignment editor and analysis workbench. *Bioinformatics*, doi:10.1093/bioinformatics/btp033
